# Supplementary material for: Assessment of Variability Sources in Grape Ripening Parameters by Using FTIR and Multivariate Modelling
Source: MDPI journal article supplement (doi:10.3390/foods12050962), 2023-02-24
Supplement: s1 [file s1]

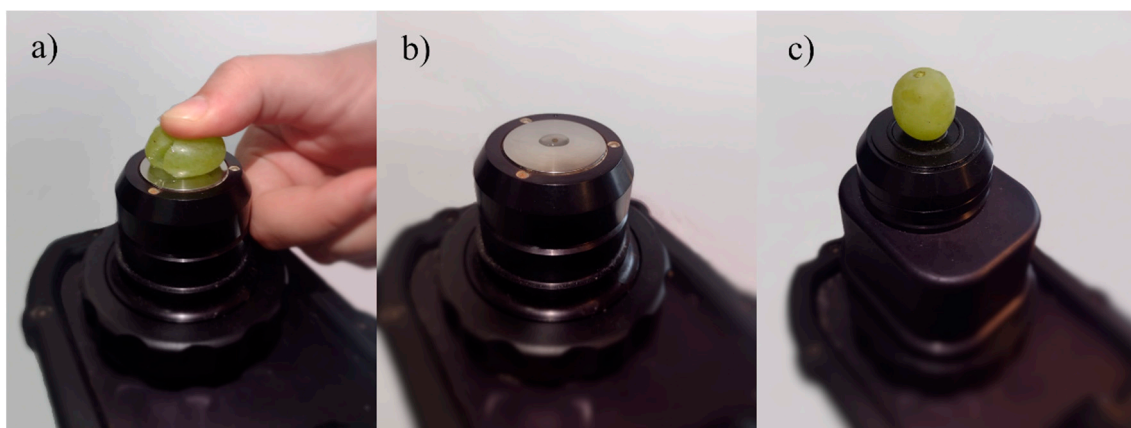

**Figure S1.** Illustrative photos taken during the analysis of grapes using the different configurations: a) ATR-FTIR for intact grape; b) ATR-FTIR for crushed grape; and c) DRIFT for intact grape.

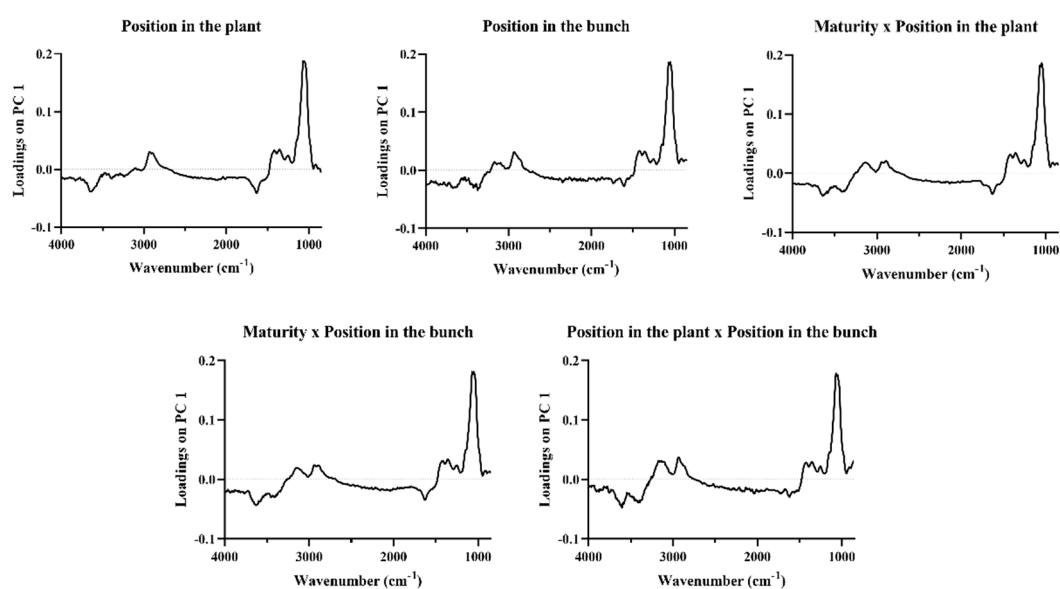

**Figure S2.** Plots of the first factor of the position in the plant, position in the bunch, interaction maturity x position in the plant, interaction maturity x position in the bunch and interaction position in the plant x position in the bunch factors submodels.

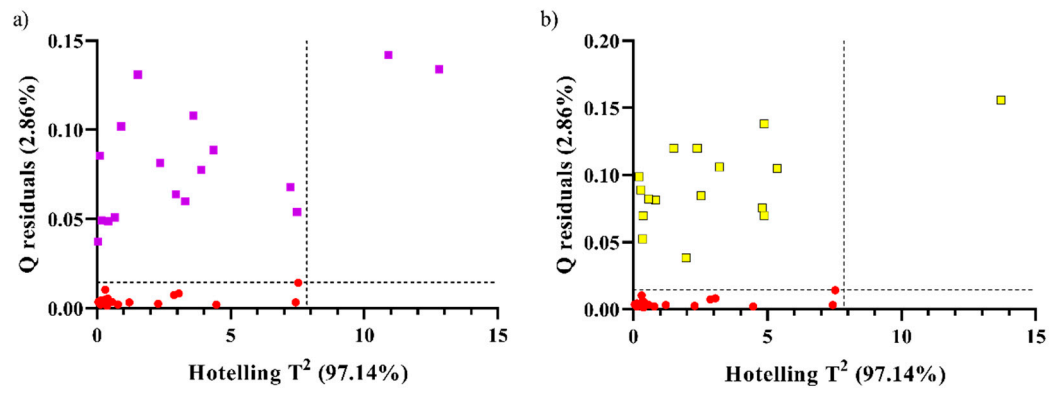

**Figure S3.** Q residual and Hotelling  $T^2$  for Time 4 (red circles) and the projection in the model of (a) Time 1 (purple squares) and (b) Time 2 (yellow squares).
