# Supplementary material for: Assessment of Variability Sources in Grape Ripening Parameters by Using FTIR and Multivariate Modelling
Source: MDPI journal article supplement (doi:10.3390/foods12050962), 2023-02-24
Supplement: s1 [file s1]

**Table S1.** Maturity, position in the plant and position in the bunch factors and their levels; the number of samples; TSS and pH values (mean  $\pm$  standard deviation) of each level of each factor. Different letters mean significant differences between the levels of the factor.

| Factor                | Level  | # Samples | TSS               | pH                 |
|-----------------------|--------|-----------|-------------------|--------------------|
| Maturity              | 1      | 18        | 16.4 $\pm$ 2.6 a  | 3.15 $\pm$ 0.08 ab |
|                       | 2      | 18        | 18.8 $\pm$ 2.1 b  | 3.10 $\pm$ 0.11 a  |
|                       | 3      | 18        | 20.7 $\pm$ 1.3 c  | 3.28 $\pm$ 0.11 cd |
|                       | 4      | 18        | 20.6 $\pm$ 1.8 bc | 3.36 $\pm$ 0.13 d  |
|                       | 5      | 18        | 21.2 $\pm$ 1.9 c  | 3.25 $\pm$ 0.09 bc |
| Position in the plant | Top    | 30        | 18.6 $\pm$ 2.9 a  | 3.19 $\pm$ 0.15 a  |
|                       | Middle | 30        | 19.5 $\pm$ 2.8 a  | 3.24 $\pm$ 0.14 a  |
|                       | Bottom | 30        | 20.2 $\pm$ 2.0 a  | 3.23 $\pm$ 0.12 a  |
| Position in the bunch | Top    | 30        | 19.6 $\pm$ 2.6 a  | 3.25 $\pm$ 0.16 a  |
|                       | Middle | 30        | 19.4 $\pm$ 2.6 a  | 3.24 $\pm$ 0.13 a  |
|                       | Bottom | 30        | 19.3 $\pm$ 2.7 a  | 3.17 $\pm$ 0.12 a  |
